# Supplementary material for: The fatty acid imbalance of cystic fibrosis exists at birth independent of feeding in pig and ferret models
Source: PubMed Central journal article supplement (PMC9747517; doi:10.1042/cs20220450), 2022-12-13

**Table 1S: Primer sequences.** The table lists the target species, gene, forward and reverse primer sequences (5' to 3'), amplicon size, and relevant NCBI accession.

**Genes of Interest**

| Species | Gene   | Forward                    | Reverse                  | Size | Accession      |
|---------|--------|----------------------------|--------------------------|------|----------------|
| Ferret  | SCD    | GTGATGTTCCAGAGAAGGTACTACAA | AACAGAGTGGCGACGAACAA     | 125  | XM_004749483.3 |
| Ferret  | FADS1  | AAGCATGGCATAGAGTACCAGTC    | CCAGACTCCTTCAGTGAGTAGAC  | 77   | XM_004770330.3 |
| Ferret  | ELOVL6 | CGAAGTTTGAAGTGAAGGAGCC     | CGAAGAGCACCGAATATACTGAAG | 76   | XM_045085544.1 |
| Ferret  | FADS2  | ATGGCAAGAACTCCCAGATCAC     | AGAAGAGGATGAACCAGGCAATG  | 150  | XM_013044579.2 |
| Pig     | SCD    | ACACTTGGGAGCCCTGTATG       | GGGCAGTCGAGCTTTGTAAG     | 154  | NM_213781.1    |
| Pig     | FADS2  | AGGACATGAACCTGTTCGAGAGCA   | TTCTTGTAACAGAGAGATGGCCG  | 208  | NM_001171750.1 |

**References Genes**

| Species | Gene  | Forward                 | Reverse                  | Size | Accession      |
|---------|-------|-------------------------|--------------------------|------|----------------|
| Ferret  | RPS18 | CTCACTGAGGATGAGGTGGAAC  | ACCAGTCTGGGATCTTATATTGGC | 73   | XM_045074698.1 |
| Ferret  | RPLP0 | CTTCTTCCAGGCTTTAGGCATCA | CTGCACATCACTCAGGATTTCAA  | 70   | XM_045073641.1 |
| Pig     | ACTB  | CTGCGGCATCCACGAACCT     | GTGATCTCCTTCTGCATCCTGTC  | 141  | XM_021086047.1 |

**Table 2S: Fatty acids measured per lab and their unification for composition analysis.** For unsaturated fatty acids measured by mass spectrometry (“Kansas”), these were unified with their corresponding fatty acids measured by gas chromatography when there were no identified alternate positional isoforms.

| Unified | Sweden | Kansas | Iowa   |
|---------|--------|--------|--------|
| 14:0    | 14:0   | 14:0   |        |
| 16:0    | 16:0   | 16:0   | 16:0   |
| 16:1n7  | 16:1n7 | 16:1   | 16:1n7 |
| 18:0    | 18:0   | 18:0   | 18:0   |
| 18:1n7  |        |        | 18:1n7 |
| 18:1n9  | 18:1n9 |        | 18:1c9 |
| 18:1t9  |        |        | 18:1t9 |
| 18:2n6  | 18:2n6 | 18:2   | 18:2c6 |
| 18:2t6  |        |        | 18:2t6 |
| 18:3n3  | 18:3n3 |        | 18:3n3 |
| 18:3n6  | 18:3n6 |        | 18:3n6 |
| 18:4n3  |        |        | 18:4n3 |
| 20:0    | 20:0   | 20:0   | 20:0   |
| 20:1n9  |        | 20:1   | 20:1n9 |
| 20:2n6  | 20:2n6 | 20:2   |        |
| 20:3n6  | 20:3n6 |        | 20:3n6 |
| 20:3n9  | 20:3n9 |        |        |
| 20:4n6  | 20:4n6 | 20:4   | 20:4n6 |
| 20:5n3  | 20:5n3 | 20:5   | 20:5n3 |
| 22:0    | 22:0   | 22:0   | 22:0   |
| 22:1n9  |        | 22:1   | 22:1n9 |
| 22:4n6  | 22:4n6 | 22:4   | 22:4n6 |
| 22:5n3  | 22:5n3 |        | 22:5n3 |
| 22:5n6  | 22:5n6 |        |        |
| 22:6n3  | 22:6n3 | 22:6   | 22:6n3 |
| 24:0    | 24:0   |        | 24:0   |
| 24:1n9  | 24:1n9 |        | 24:1n9 |

**Table 3S: Fatty acids measured per lab omitted from unified analysis.** The mean  $\pm$  s.e.m. mole% for each fatty acid measurement across the dataset is shown in parentheses. Footnotes indicate the reason(s) each fatty acid was omitted from the unified dataset.

| Not unified   | Sweden                                    | Kansas                                 | Iowa                                         |
|---------------|-------------------------------------------|----------------------------------------|----------------------------------------------|
| 12:0          | 12:0 <sup>a</sup> (0 $\pm$ 0)             |                                        |                                              |
| 14:1n5        | 14:1n5 <sup>a</sup> (0.0035 $\pm$ 0.0007) |                                        |                                              |
| 18:1          |                                           | 18:1 <sup>b,c</sup> (25.64 $\pm$ 1.05) |                                              |
| 18:3          |                                           | 18:3 <sup>b</sup> (1.37 $\pm$ 0.19)    |                                              |
| 20:2n6+20:3n9 |                                           |                                        | 20:2n6+20:3n9 <sup>d</sup> (1.86 $\pm$ 0.12) |
| 20:3n3        |                                           |                                        | 20:3n3 <sup>a</sup> (0.057 $\pm$ 0.013)      |
| 20:3          |                                           | 20:3 <sup>b</sup> (4.02 $\pm$ 0.37)    |                                              |
| 21:0          |                                           | 21:0 <sup>a</sup> (0.024 $\pm$ 0.024)  |                                              |
| 21:1          |                                           | 21:1 <sup>b</sup> (2.64 $\pm$ 0.23)    |                                              |
| 22:2n6        |                                           |                                        | 22:2n6 <sup>a</sup> (0.054 $\pm$ 0.004)      |
| 22:3n3        |                                           |                                        | 22:3n3 <sup>a</sup> (0.061 $\pm$ 0.002)      |
| 22:5          |                                           | 22:5 <sup>b</sup> (1.64 $\pm$ 0.22)    |                                              |

<sup>a</sup> Fatty acid of very minimal abundance (<0.1%) measured only in one laboratory. <sup>b</sup> Likely mix of two or more unsaturation positions of non-trivial relative abundance. <sup>c</sup> Porcine red blood cells and serum can contain non-trivial (2-7 mole%) amounts of 18:1n-7 (see PMID: [22223579](https://pubmed.ncbi.nlm.nih.gov/22223579/) & [19434740](https://pubmed.ncbi.nlm.nih.gov/19434740/)). <sup>d</sup> These two fatty acids could not be resolved from each other.

**Table 4S: Fatty acids whose composition was significantly impacted by cystic fibrosis.** Of 559 pairwise comparisons between CF and non-CF, 70 met strict criteria for statistical significance of FDR<0.05 accounting for multiple hypothesis testing. Mean  $\pm$  SEM are shown for non-CF and CF. Lipid class abbreviations: L total lipid; CE cholesterol esters, NEFA non-esterified fatty acids; PL general phospholipids; PC phosphatidylcholine; PE phosphatidylethanolamine; PI phosphatidylinositol; PS phosphatidylserine; LPC lysophosphatidylcholines; LPE lysophosphatidylethanolamine; NEFA non-esterified fatty acids; SM2 sphingomyelin 2. Trans fatty acids are indicated by a “t”. Newborns 0-1 were days old; preweans 2-42 days old; juvenile, 43-150 days old. The table is presented twice, first sorted by fatty acid, and second sorted by species. (a) Unsaturated fatty acids without an omega indicator were measured by mass spectrometry and thus positional information was not determined. Generally, 18:1, 18:3, 22:5 may be a mixture of different omega isomers. By contrast, the following species are likely nearly entirely comprised of the indicated omega isomer: 16:1  $\approx$  16:1n-7; 18:2  $\approx$  18:2n-6; 20:1  $\approx$  20:1n-9; 20:4  $\approx$  20:4n-6; 20:5  $\approx$  20:5n-3; 22:6  $\approx$  22:6n-3.

Sorted by fatty acid

| Fatty Acid        | Tissue | Class | CF               | non-CF           | Age      | Species | N     | FDR     |
|-------------------|--------|-------|------------------|------------------|----------|---------|-------|---------|
| 14:0              | Plasma | NEFA  | 3.14 $\pm$ 0.26  | 1.84 $\pm$ 0.15  | Newborn  | Ferret  | 5,5   | 0.02619 |
| 14:0              | Plasma | NEFA  | 2.89 $\pm$ 0.17  | 1.59 $\pm$ 0.25  | Prewean  | Ferret  | 6,6   | 0.01851 |
| 16:0              | Liver  | L     | 18.49 $\pm$ 0.26 | 20.72 $\pm$ 0.37 | Newborn  | Pig     | 13,7  | 0.00319 |
| 16:0              | Liver  | SM2   | 28.95 $\pm$ 1.69 | 37.9 $\pm$ 1.46  | Newborn  | Pig     | 13,7  | 0.02491 |
| 16:0              | Plasma | LPC   | 57.36 $\pm$ 2.44 | 46.03 $\pm$ 1.1  | Prewean  | Ferret  | 6,6   | 0.01926 |
| 16:0              | RBC    | L     | 27.86 $\pm$ 0.49 | 24.55 $\pm$ 0.27 | Juvenile | Ferret  | 5,6   | 0.00413 |
| 16:1 <sup>a</sup> | Plasma | CE    | 16.95 $\pm$ 0.33 | 12.44 $\pm$ 0.8  | Newborn  | Pig     | 6,5   | 0.00596 |
| 16:1 <sup>a</sup> | Plasma | LPC   | 5.45 $\pm$ 0.23  | 3.37 $\pm$ 0.44  | Newborn  | Pig     | 6,5   | 0.01851 |
| 16:1n7            | Liver  | L     | 4.9 $\pm$ 0.2    | 3.72 $\pm$ 0.29  | Newborn  | Pig     | 13,7  | 0.03008 |
| 16:1n7            | Liver  | PC    | 5.74 $\pm$ 0.21  | 3.96 $\pm$ 0.29  | Newborn  | Pig     | 13,7  | 0.00319 |
| 18:0              | RBC    | L     | 13.61 $\pm$ 0.36 | 15.73 $\pm$ 0.38 | Juvenile | Ferret  | 5,6   | 0.03008 |
| 18:1 <sup>a</sup> | Plasma | LPE   | 49.46 $\pm$ 1.79 | 20.41 $\pm$ 3.54 | Newborn  | Ferret  | 5,5   | 0.00319 |
| 18:1n7            | Liver  | L     | 14.24 $\pm$ 0.51 | 11.62 $\pm$ 0.43 | Newborn  | Ferret  | 17,24 | 0.00596 |
| 18:1n7            | RBC    | L     | 4.37 $\pm$ 0.27  | 2.86 $\pm$ 0.07  | Juvenile | Ferret  | 5,6   | 0.00509 |
| 18:2 <sup>a</sup> | Plasma | NEFA  | 4.18 $\pm$ 0.31  | 9.44 $\pm$ 0.76  | Newborn  | Ferret  | 5,5   | 0.00429 |
| 18:2 <sup>a</sup> | RBC    | L     | 5.09 $\pm$ 0.52  | 11.36 $\pm$ 0.95 | Juvenile | Ferret  | 5,6   | 0.00646 |
| 18:2n6            | Liver  | L     | 4.91 $\pm$ 0.15  | 8.29 $\pm$ 0.9   | Newborn  | Pig     | 13,7  | 0.00319 |
| 18:2n6            | Liver  | L     | 4.54 $\pm$ 0.11  | 5.31 $\pm$ 0.14  | Newborn  | Pig     | 4,5   | 0.03386 |
| 18:2n6            | Liver  | PC    | 4.55 $\pm$ 0.16  | 9.39 $\pm$ 1.2   | Newborn  | Pig     | 13,7  | 0.00244 |
| 18:2n6            | Liver  | PE    | 1.9 $\pm$ 0.07   | 4.71 $\pm$ 0.62  | Newborn  | Pig     | 13,7  | 0.00071 |
| 18:2n6            | Liver  | PI    | 0.34 $\pm$ 0.03  | 1.01 $\pm$ 0.27  | Newborn  | Pig     | 12,7  | 0.03967 |
| 18:2n6            | Liver  | PS    | 0.85 $\pm$ 0.05  | 1.92 $\pm$ 0.33  | Newborn  | Pig     | 13,7  | 0.00607 |
| 18:2n6            | Liver  | SM2   | 0.3 $\pm$ 0.02   | 0.55 $\pm$ 0.06  | Newborn  | Pig     | 13,7  | 0.00570 |
| 18:2n6            | Serum  | PL    | 4.03 $\pm$ 0.4   | 15.89 $\pm$ 1.58 | Newborn  | Pig     | 13,7  | 0.00001 |
| 18:2t6            | RBC    | L     | 0.18 $\pm$ 0.02  | 0.05 $\pm$ 0.01  | Juvenile | Ferret  | 5,6   | 0.00319 |
| 18:3 <sup>a</sup> | Plasma | NEFA  | 1.27 $\pm$ 0.07  | 1.61 $\pm$ 0.03  | Newborn  | Ferret  | 5,5   | 0.03204 |
| 18:3n6            | RBC    | L     | 0.17 $\pm$ 0.01  | 0.1 $\pm$ 0.01   | Juvenile | Ferret  | 5,6   | 0.01442 |
| 18:4n3            | RBC    | L     | 0.56 $\pm$ 0.04  | 0.4 $\pm$ 0.01   | Juvenile | Ferret  | 5,6   | 0.03256 |
| 20:0              | Plasma | NEFA  | 2.01 $\pm$ 0.18  | 0.77 $\pm$ 0.08  | Newborn  | Ferret  | 5,5   | 0.00509 |
| 20:0              | Serum  | PL    | 1.81 $\pm$ 0.16  | 0.8 $\pm$ 0.15   | Newborn  | Pig     | 13,7  | 0.00882 |

|                   |        |      |            |            |          |        |      |         |
|-------------------|--------|------|------------|------------|----------|--------|------|---------|
| 20:1 <sup>a</sup> | Plasma | NEFA | 1.4±0.08   | 0.61±0.07  | Newborn  | Ferret | 5,5  | 0.00319 |
| 20:1n9            | RBC    | L    | 0.65±0.02  | 0.56±0.01  | Newborn  | Ferret | 9,13 | 0.02143 |
| 20:2n6            | Liver  | L    | 0.06±0     | 0.18±0.03  | Newborn  | Pig    | 13,7 | 0.00347 |
| 20:2n6            | Liver  | PC   | 0.07±0     | 0.18±0.03  | Newborn  | Pig    | 13,7 | 0.00299 |
| 20:2n6            | Liver  | PE   | 0.05±0     | 0.2±0.03   | Newborn  | Pig    | 13,7 | 0.00107 |
| 20:2n6            | Serum  | PL   | 0.08±0.01  | 0.21±0.03  | Newborn  | Pig    | 13,7 | 0.00063 |
| 20:2n6            | RBC    | L    | 1.6±0.24   | 0.41±0.02  | Juvenile | Ferret | 5,6  | 0.00596 |
| 20:3n6            | Liver  | PS   | 0.77±0.05  | 1.11±0.09  | Newborn  | Pig    | 13,7 | 0.01851 |
| 20:3n6            | RBC    | L    | 0.87±0.04  | 0.4±0.02   | Juvenile | Ferret | 5,6  | 0.00026 |
| 20:3n9            | Liver  | L    | 1.69±0.16  | 0.94±0.12  | Newborn  | Pig    | 13,7 | 0.03936 |
| 20:3n9            | Liver  | PC   | 1.24±0.12  | 0.61±0.09  | Newborn  | Pig    | 13,7 | 0.02083 |
| 20:3n9            | Liver  | PI   | 8.24±0.66  | 4.65±0.65  | Newborn  | Pig    | 12,7 | 0.02348 |
| 20:4 <sup>a</sup> | Plasma | LPC  | 4.06±0.72  | 8.98±0.58  | Newborn  | Ferret | 5,5  | 0.00954 |
| 20:4 <sup>a</sup> | Plasma | LPC  | 3.69±0.54  | 9.15±0.68  | Prewean  | Ferret | 6,6  | 0.00319 |
| 20:4n6            | Liver  | PE   | 29.31±0.38 | 24.44±0.66 | Newborn  | Pig    | 13,7 | 0.00026 |
| 20:5 <sup>a</sup> | Plasma | CE   | 2.19±0.22  | 4.86±0.36  | Newborn  | Ferret | 5,5  | 0.00452 |
| 20:5 <sup>a</sup> | Plasma | CE   | 2.86±0.28  | 4.99±0.2   | Prewean  | Ferret | 6,6  | 0.00319 |
| 20:5 <sup>a</sup> | Plasma | LPC  | 0.35±0.1   | 0.92±0.05  | Newborn  | Ferret | 5,5  | 0.01516 |
| 20:5n3            | Liver  | L    | 0.16±0.01  | 0.09±0.01  | Newborn  | Pig    | 13,7 | 0.01752 |
| 20:5n3            | Liver  | PC   | 0.17±0.01  | 0.08±0.02  | Newborn  | Pig    | 13,7 | 0.00429 |
| 20:5n3            | Liver  | PE   | 0.23±0.01  | 0.15±0.02  | Newborn  | Pig    | 13,7 | 0.04568 |
| 20:5n3            | RBC    | L    | 0.28±0.1   | 1.02±0.11  | Juvenile | Ferret | 5,6  | 0.01443 |
| 22:1n9            | RBC    | L    | 0.22±0.02  | 0.15±0.01  | Juvenile | Ferret | 5,6  | 0.03008 |
| 22:4n6            | Liver  | PC   | 0.47±0.05  | 0.27±0.02  | Newborn  | Pig    | 4,5  | 0.03311 |
| 22:4n6            | Liver  | PE   | 0.74±0.05  | 0.46±0.04  | Newborn  | Pig    | 4,5  | 0.02619 |
| 22:4n6            | Liver  | PS   | 0.37±0.04  | 0.61±0.08  | Newborn  | Pig    | 13,7 | 0.04914 |
| 22:4n6            | RBC    | L    | 3.3±0.32   | 1.68±0.1   | Juvenile | Ferret | 5,6  | 0.00796 |
| 22:5 <sup>a</sup> | Plasma | LPC  | 0.43±0.13  | 1.09±0.05  | Newborn  | Ferret | 5,5  | 0.01752 |
| 22:5 <sup>a</sup> | Plasma | LPC  | 0.27±0.06  | 0.81±0.08  | Prewean  | Ferret | 6,6  | 0.00635 |
| 22:5n3            | Liver  | LPC  | 0.77±0.06  | 1.78±0.26  | Newborn  | Pig    | 13,7 | 0.00374 |
| 22:5n3            | Serum  | PL   | 0.35±0.03  | 0.49±0.02  | Newborn  | Pig    | 13,7 | 0.04834 |
| 22:5n6            | Liver  | PS   | 4.27±0.36  | 7.42±0.8   | Newborn  | Pig    | 13,7 | 0.00850 |
| 22:6 <sup>a</sup> | Plasma | LPC  | 0.88±0.24  | 2.7±0.33   | Newborn  | Ferret | 5,5  | 0.02083 |
| 22:6 <sup>a</sup> | Plasma | LPC  | 0.7±0.16   | 2.57±0.28  | Prewean  | Ferret | 6,6  | 0.00413 |
| 22:6 <sup>a</sup> | Plasma | LPE  | 8.87±2.75  | 30.17±3.88 | Newborn  | Ferret | 5,5  | 0.02143 |
| 22:6 <sup>a</sup> | Plasma | LPE  | 8.55±1.86  | 32.46±3.67 | Prewean  | Ferret | 6,6  | 0.00413 |
| 22:6n3            | Liver  | LPC  | 2.18±0.22  | 4.74±0.63  | Newborn  | Pig    | 13,7 | 0.00413 |
| 24:0              | Serum  | PL   | 0.7±0.04   | 0.42±0.07  | Newborn  | Pig    | 13,7 | 0.01693 |
| 24:1n9            | Serum  | PL   | 3.13±0.21  | 1.47±0.27  | Newborn  | Pig    | 13,7 | 0.00413 |
| 24:1n9            | RBC    | L    | 2.11±0.07  | 1.21±0.05  | Juvenile | Ferret | 5,6  | 0.00026 |

Sorted by species

| Fatty Acid | Tissue | Class | CF         | non-CF    | Age     | Species | N   | FDR     |
|------------|--------|-------|------------|-----------|---------|---------|-----|---------|
| 14:0       | Plasma | NEFA  | 3.14±0.26  | 1.84±0.15 | Newborn | Ferret  | 5,5 | 0.02619 |
| 14:0       | Plasma | NEFA  | 2.89±0.17  | 1.59±0.25 | Prewean | Ferret  | 6,6 | 0.01851 |
| 16:0       | Plasma | LPC   | 57.36±2.44 | 46.03±1.1 | Prewean | Ferret  | 6,6 | 0.01926 |

|        |        |      |            |            |          |        |       |         |
|--------|--------|------|------------|------------|----------|--------|-------|---------|
| 16:0   | RBC    | L    | 27.86±0.49 | 24.55±0.27 | Juvenile | Ferret | 5,6   | 0.00413 |
| 18:0   | RBC    | L    | 13.61±0.36 | 15.73±0.38 | Juvenile | Ferret | 5,6   | 0.03008 |
| 18:1   | Plasma | LPE  | 49.46±1.79 | 20.41±3.54 | Newborn  | Ferret | 5,5   | 0.00319 |
| 18:1n7 | Liver  | L    | 14.24±0.51 | 11.62±0.43 | Newborn  | Ferret | 17,24 | 0.00596 |
| 18:1n7 | RBC    | L    | 4.37±0.27  | 2.86±0.07  | Juvenile | Ferret | 5,6   | 0.00509 |
| 18:2   | Plasma | NEFA | 4.18±0.31  | 9.44±0.76  | Newborn  | Ferret | 5,5   | 0.00429 |
| 18:2   | RBC    | L    | 5.09±0.52  | 11.36±0.95 | Juvenile | Ferret | 5,6   | 0.00646 |
| 18:2t6 | RBC    | L    | 0.18±0.02  | 0.05±0.01  | Juvenile | Ferret | 5,6   | 0.00319 |
| 18:3   | Plasma | NEFA | 1.27±0.07  | 1.61±0.03  | Newborn  | Ferret | 5,5   | 0.03204 |
| 18:3n6 | RBC    | L    | 0.17±0.01  | 0.1±0.01   | Juvenile | Ferret | 5,6   | 0.01442 |
| 18:4n3 | RBC    | L    | 0.56±0.04  | 0.4±0.01   | Juvenile | Ferret | 5,6   | 0.03256 |
| 20:0   | Plasma | NEFA | 2.01±0.18  | 0.77±0.08  | Newborn  | Ferret | 5,5   | 0.00509 |
| 20:1   | Plasma | NEFA | 1.4±0.08   | 0.61±0.07  | Newborn  | Ferret | 5,5   | 0.00319 |
| 20:1n9 | RBC    | L    | 0.65±0.02  | 0.56±0.01  | Newborn  | Ferret | 9,13  | 0.02143 |
| 20:2n6 | RBC    | L    | 1.6±0.24   | 0.41±0.02  | Juvenile | Ferret | 5,6   | 0.00596 |
| 20:3n6 | RBC    | L    | 0.87±0.04  | 0.4±0.02   | Juvenile | Ferret | 5,6   | 0.00026 |
| 20:4   | Plasma | LPC  | 4.06±0.72  | 8.98±0.58  | Newborn  | Ferret | 5,5   | 0.00954 |
| 20:4   | Plasma | LPC  | 3.69±0.54  | 9.15±0.68  | Prewean  | Ferret | 6,6   | 0.00319 |
| 20:5   | Plasma | CE   | 2.19±0.22  | 4.86±0.36  | Newborn  | Ferret | 5,5   | 0.00452 |
| 20:5   | Plasma | CE   | 2.86±0.28  | 4.99±0.2   | Prewean  | Ferret | 6,6   | 0.00319 |
| 20:5   | Plasma | LPC  | 0.35±0.1   | 0.92±0.05  | Newborn  | Ferret | 5,5   | 0.01516 |
| 20:5n3 | RBC    | L    | 0.28±0.1   | 1.02±0.11  | Juvenile | Ferret | 5,6   | 0.01443 |
| 22:1n9 | RBC    | L    | 0.22±0.02  | 0.15±0.01  | Juvenile | Ferret | 5,6   | 0.03008 |
| 22:4n6 | RBC    | L    | 3.3±0.32   | 1.68±0.1   | Juvenile | Ferret | 5,6   | 0.00796 |
| 22:5   | Plasma | LPC  | 0.43±0.13  | 1.09±0.05  | Newborn  | Ferret | 5,5   | 0.01752 |
| 22:5   | Plasma | LPC  | 0.27±0.06  | 0.81±0.08  | Prewean  | Ferret | 6,6   | 0.00635 |
| 22:6   | Plasma | LPC  | 0.88±0.24  | 2.7±0.33   | Newborn  | Ferret | 5,5   | 0.02083 |
| 22:6   | Plasma | LPC  | 0.7±0.16   | 2.57±0.28  | Prewean  | Ferret | 6,6   | 0.00413 |
| 22:6   | Plasma | LPE  | 8.87±2.75  | 30.17±3.88 | Newborn  | Ferret | 5,5   | 0.02143 |
| 22:6   | Plasma | LPE  | 8.55±1.86  | 32.46±3.67 | Prewean  | Ferret | 6,6   | 0.00413 |
| 24:1n9 | RBC    | L    | 2.11±0.07  | 1.21±0.05  | Juvenile | Ferret | 5,6   | 0.00026 |
| 16:0   | Liver  | L    | 18.49±0.26 | 20.72±0.37 | Newborn  | Pig    | 13,7  | 0.00319 |
| 16:0   | Liver  | SM2  | 28.95±1.69 | 37.9±1.46  | Newborn  | Pig    | 13,7  | 0.02491 |
| 16:1   | Plasma | CE   | 16.95±0.33 | 12.44±0.8  | Newborn  | Pig    | 6,5   | 0.00596 |
| 16:1   | Plasma | LPC  | 5.45±0.23  | 3.37±0.44  | Newborn  | Pig    | 6,5   | 0.01851 |
| 16:1n7 | Liver  | L    | 4.9±0.2    | 3.72±0.29  | Newborn  | Pig    | 13,7  | 0.03008 |
| 16:1n7 | Liver  | PC   | 5.74±0.21  | 3.96±0.29  | Newborn  | Pig    | 13,7  | 0.00319 |
| 18:2n6 | Liver  | L    | 4.91±0.15  | 8.29±0.9   | Newborn  | Pig    | 13,7  | 0.00319 |
| 18:2n6 | Liver  | L    | 4.54±0.11  | 5.31±0.14  | Newborn  | Pig    | 4,5   | 0.03386 |
| 18:2n6 | Liver  | PC   | 4.55±0.16  | 9.39±1.2   | Newborn  | Pig    | 13,7  | 0.00244 |
| 18:2n6 | Liver  | PE   | 1.9±0.07   | 4.71±0.62  | Newborn  | Pig    | 13,7  | 0.00071 |
| 18:2n6 | Liver  | PI   | 0.34±0.03  | 1.01±0.27  | Newborn  | Pig    | 12,7  | 0.03967 |
| 18:2n6 | Liver  | PS   | 0.85±0.05  | 1.92±0.33  | Newborn  | Pig    | 13,7  | 0.00607 |
| 18:2n6 | Liver  | SM2  | 0.3±0.02   | 0.55±0.06  | Newborn  | Pig    | 13,7  | 0.00570 |
| 18:2n6 | Serum  | PL   | 4.03±0.4   | 15.89±1.58 | Newborn  | Pig    | 13,7  | 0.00001 |
| 20:0   | Serum  | PL   | 1.81±0.16  | 0.8±0.15   | Newborn  | Pig    | 13,7  | 0.00882 |
| 20:2n6 | Liver  | L    | 0.06±0     | 0.18±0.03  | Newborn  | Pig    | 13,7  | 0.00347 |

|        |       |     |            |            |         |     |      |         |
|--------|-------|-----|------------|------------|---------|-----|------|---------|
| 20:2n6 | Liver | PC  | 0.07±0     | 0.18±0.03  | Newborn | Pig | 13,7 | 0.00299 |
| 20:2n6 | Liver | PE  | 0.05±0     | 0.2±0.03   | Newborn | Pig | 13,7 | 0.00107 |
| 20:2n6 | Serum | PL  | 0.08±0.01  | 0.21±0.03  | Newborn | Pig | 13,7 | 0.00063 |
| 20:3n6 | Liver | PS  | 0.77±0.05  | 1.11±0.09  | Newborn | Pig | 13,7 | 0.01851 |
| 20:3n9 | Liver | L   | 1.69±0.16  | 0.94±0.12  | Newborn | Pig | 13,7 | 0.03936 |
| 20:3n9 | Liver | PC  | 1.24±0.12  | 0.61±0.09  | Newborn | Pig | 13,7 | 0.02083 |
| 20:3n9 | Liver | PI  | 8.24±0.66  | 4.65±0.65  | Newborn | Pig | 12,7 | 0.02348 |
| 20:4n6 | Liver | PE  | 29.31±0.38 | 24.44±0.66 | Newborn | Pig | 13,7 | 0.00026 |
| 20:5n3 | Liver | L   | 0.16±0.01  | 0.09±0.01  | Newborn | Pig | 13,7 | 0.01752 |
| 20:5n3 | Liver | PC  | 0.17±0.01  | 0.08±0.02  | Newborn | Pig | 13,7 | 0.00429 |
| 20:5n3 | Liver | PE  | 0.23±0.01  | 0.15±0.02  | Newborn | Pig | 13,7 | 0.04568 |
| 22:4n6 | Liver | PC  | 0.47±0.05  | 0.27±0.02  | Newborn | Pig | 4,5  | 0.03311 |
| 22:4n6 | Liver | PE  | 0.74±0.05  | 0.46±0.04  | Newborn | Pig | 4,5  | 0.02619 |
| 22:4n6 | Liver | PS  | 0.37±0.04  | 0.61±0.08  | Newborn | Pig | 13,7 | 0.04914 |
| 22:5n3 | Liver | LPC | 0.77±0.06  | 1.78±0.26  | Newborn | Pig | 13,7 | 0.00374 |
| 22:5n3 | Serum | PL  | 0.35±0.03  | 0.49±0.02  | Newborn | Pig | 13,7 | 0.04834 |
| 22:5n6 | Liver | PS  | 4.27±0.36  | 7.42±0.8   | Newborn | Pig | 13,7 | 0.00850 |
| 22:6n3 | Liver | LPC | 2.18±0.22  | 4.74±0.63  | Newborn | Pig | 13,7 | 0.00413 |
| 24:0   | Serum | PL  | 0.7±0.04   | 0.42±0.07  | Newborn | Pig | 13,7 | 0.01693 |
| 24:1n9 | Serum | PL  | 3.13±0.21  | 1.47±0.27  | Newborn | Pig | 13,7 | 0.00413 |

**Figure 1S: Early fatty acid composition abnormalities induced by CF.** Fatty acid composition was measured in mole% in the serum and plasma of never-fed newborn pigs. The impact of CF versus non-CF status on fatty acid composition was determined using linear mixed effect modeling treating subjects and lab of analysis as random effects. Linear modeling was used for those fatty acids for which there were not per-subject and per-lab repeated measures. Significance: black FDR<0.05, orange FDR>0.05 and p<0.05, light blue p>0.05. The number of measurements (n) underlying each fatty acid shown on the right side of the graph.

**Plasma and Serum of Newborn Unfed Piglets**

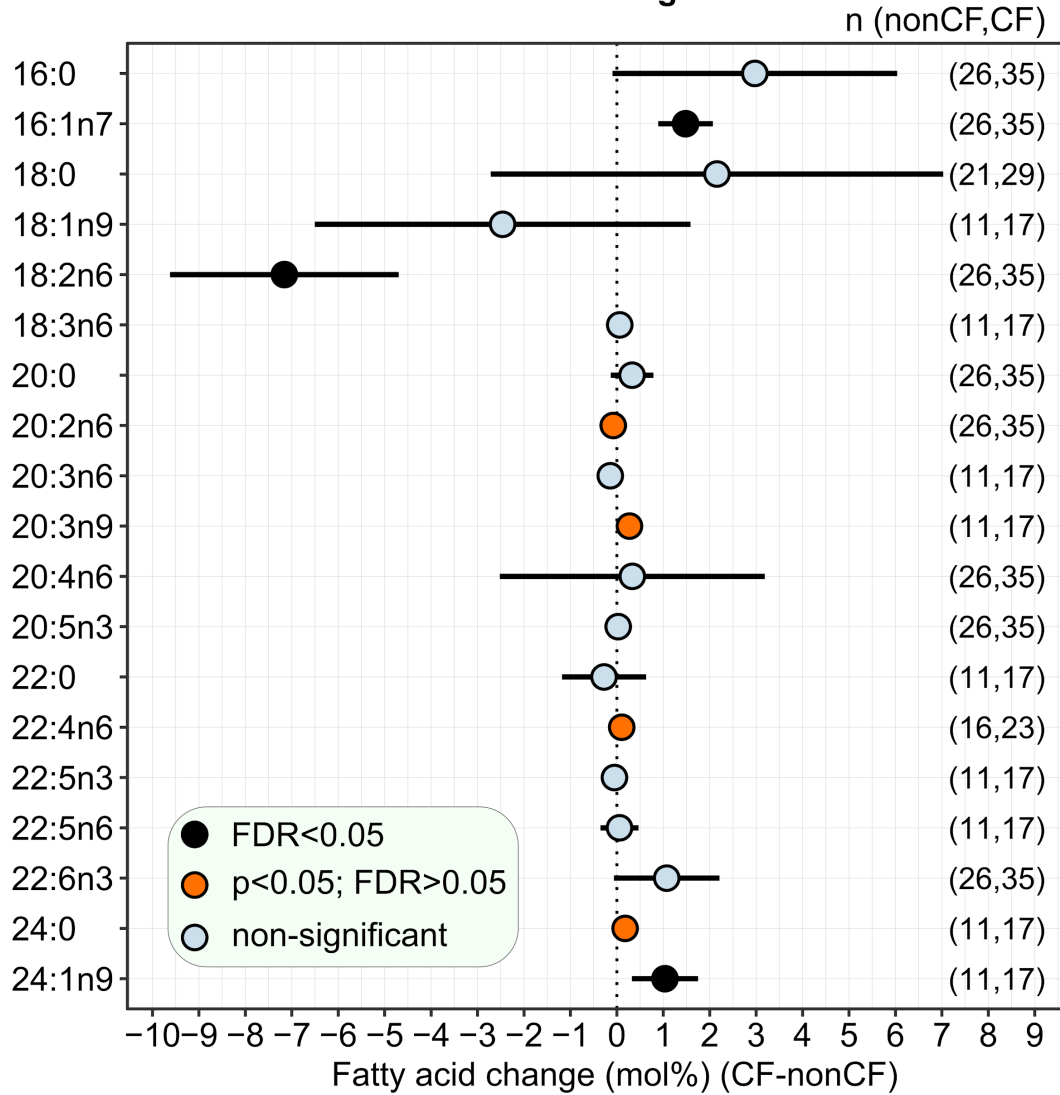



**Figure 2S: Ferret plasma lipid fatty acid composition changes over the first 3 weeks of life, examined by lipid class.** N=11 ferrets per genotype, without repeated sampling, 1-4 samples per time point. Principal component analysis is shown, plotting the changes in fatty acid profile of CF (red) versus non-CF (blue) ferrets. Four lipid classes were studied: lysophosphatidylcholine LPC, lysophosphatidylethanolamine LPE, cholesterol esters CE, and non-esterified fatty acids NEFA. The age in days is indicated for each point on the graph. The top graphs represent all lipid classes analyzed jointly, and thus are exactly identical to figure 5. The subsequent graphs represent the impact of each isolated lipid class on the principal component coordinates. LPC and LPE are on this page; CE and NEFA on the next page. For each row, the left-sided and right-sided graphs are identical but just shown at different “magnifications”. The left-sided graphs have the identical scale as the all-class analysis to allow comparison, whereas the right-sided graphs are scaled individually “i.e. magnified”.

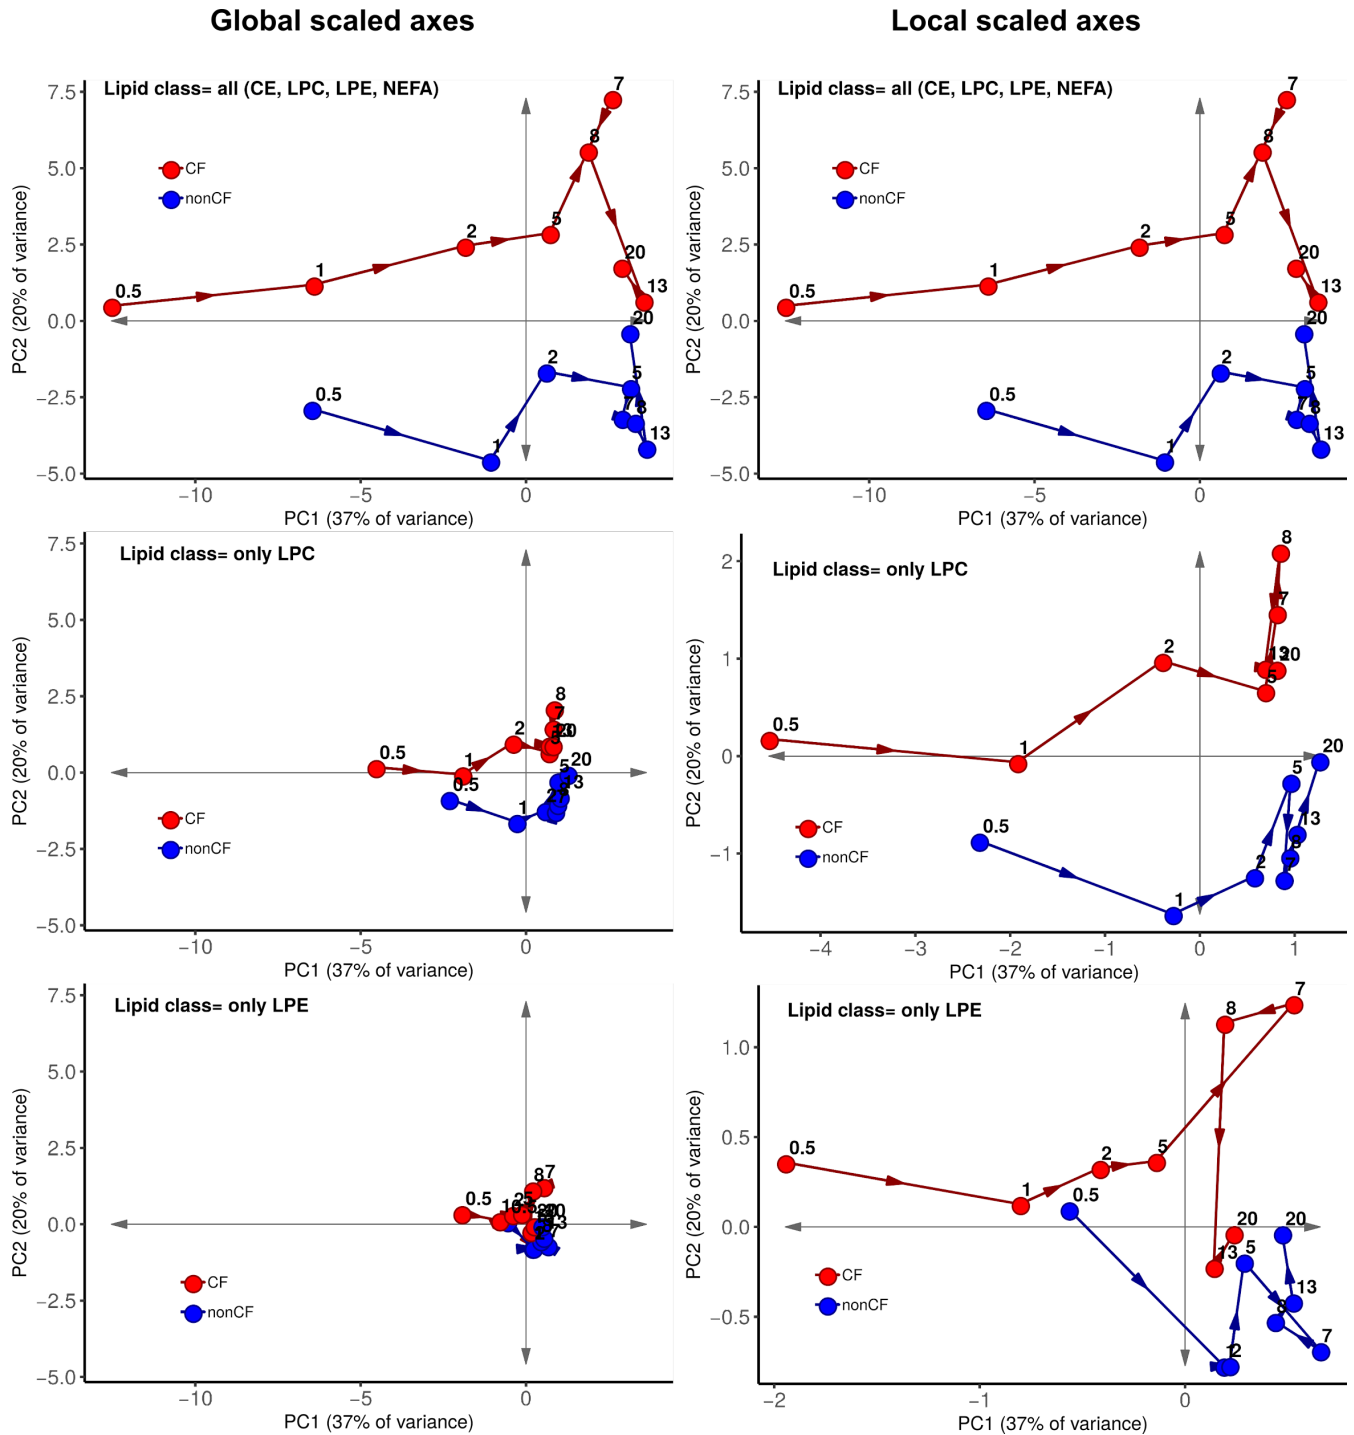

Figure 2S (continued):

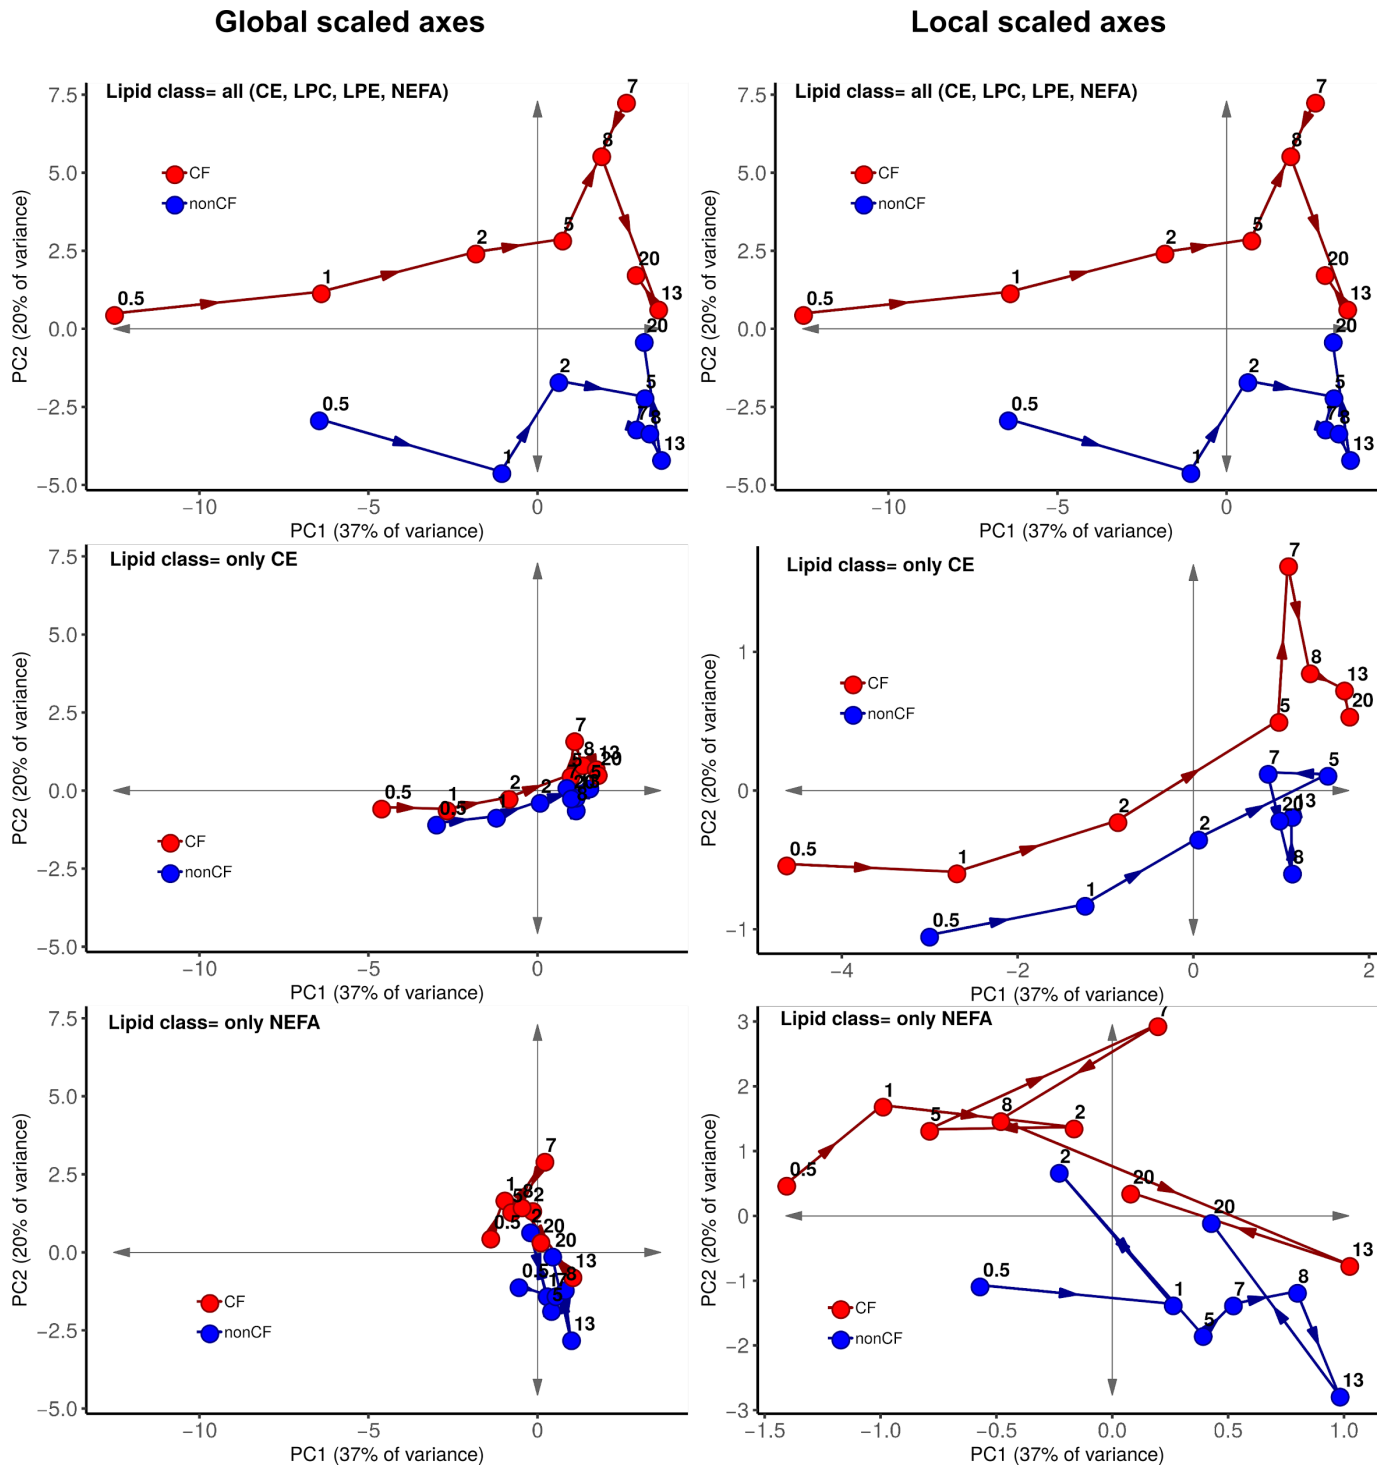

**Figure 3S: Ferret plasma lipid fatty acid composition changes over the first 3 weeks of life.** N=11 ferrets per genotype, without repeated sampling, 1-4 samples per time point. Changes over time in composition for the top positive and negative contributors to each principal component of Figure 5 are shown.

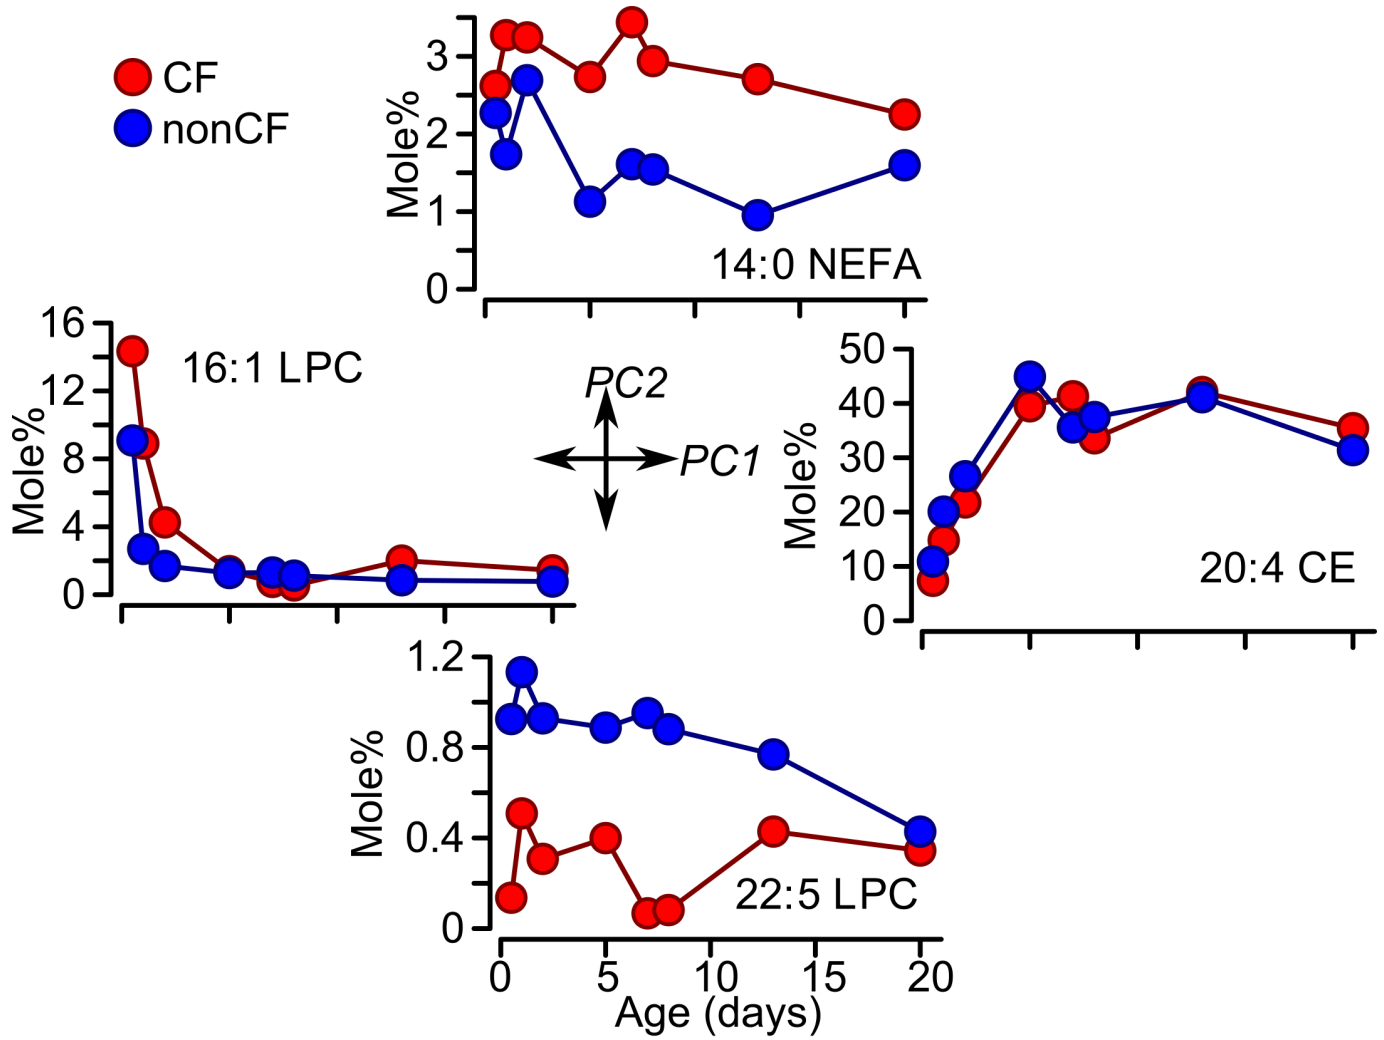

**Figure 4S: Relative influence of genotype (CF versus non-CF) and other factors on serum phospholipid composition.** The composition of 292 phospholipids was subject to Factor Analysis on Mixed Data. The resulting 2 principal dimensions in log10 space are shown, with the explained variance per axis noted in parentheses.

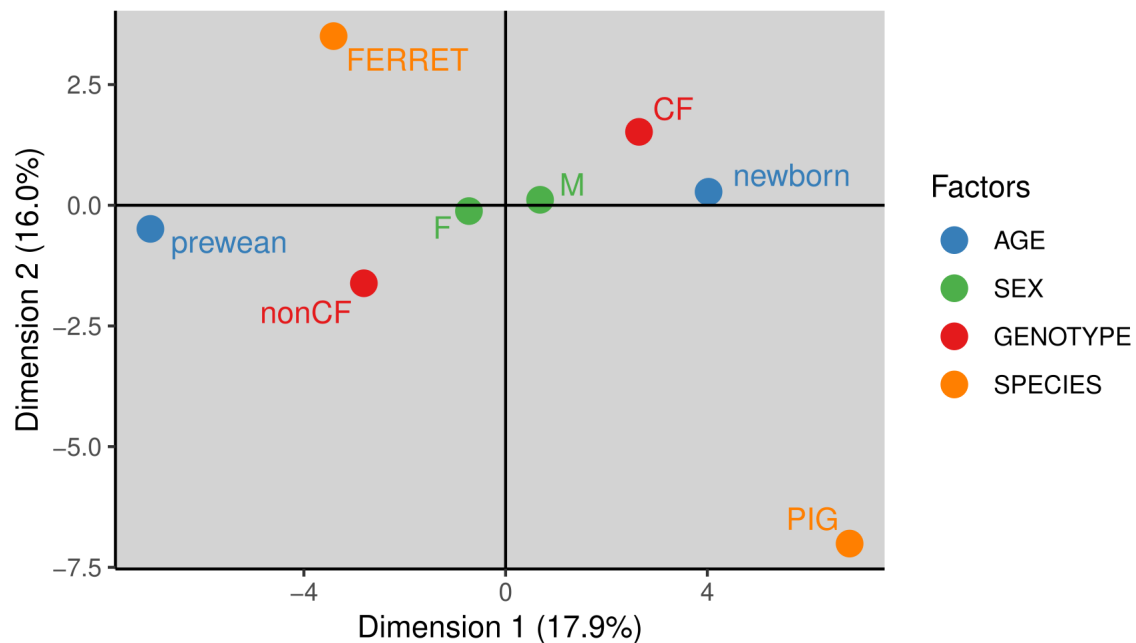

**Figure 5S: The impact of CF on composition of 292 phospholipids as assessed by serum samples collected from pigs (A) or ferrets (B).** The volcano plots show changes in individual phospholipids between CF and non-CF samples, with significance determined by linear mixed effects modeling. The x-axis indicates the relative genotype effect in mole% divided by the mean mole% across the samples. N= 5 versus 6 (A), and 11 versus 11 (B). Comparisons reaching only nominal significance with  $p < 0.05$  are orange; those also reaching a false discovery rate (FDR) of  $< 0.05$  are black; those also reaching Bonferroni adjusted significance of  $p < 0.05/292$  are red.

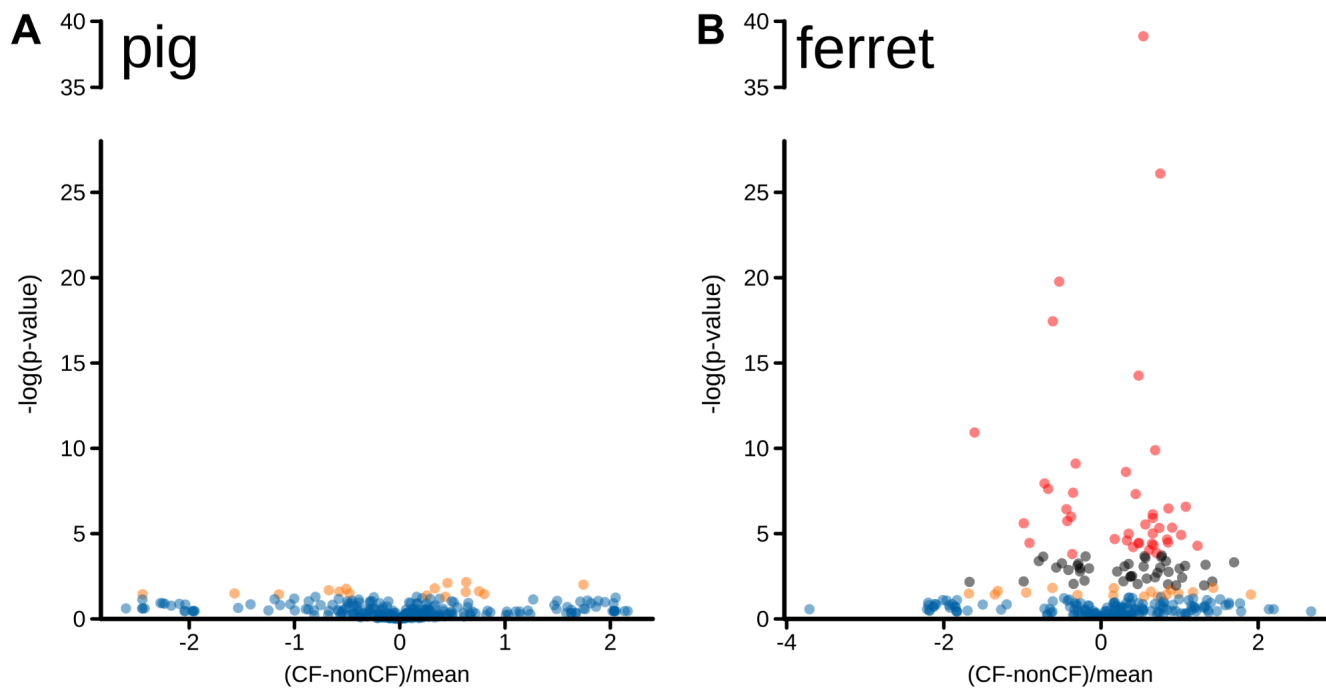

**Figure 6S: Phospholipids highly impacted by CF in ferret serum.** The 41 phospholipids that were significantly ( $p < 0.05/292$ ) impacted by CF are shown. Mean effects and 95% confidence intervals (points and bars) are shown and account for multiple co-variates as described in methods. N=11 non-CF and N=11 CF independent samples.

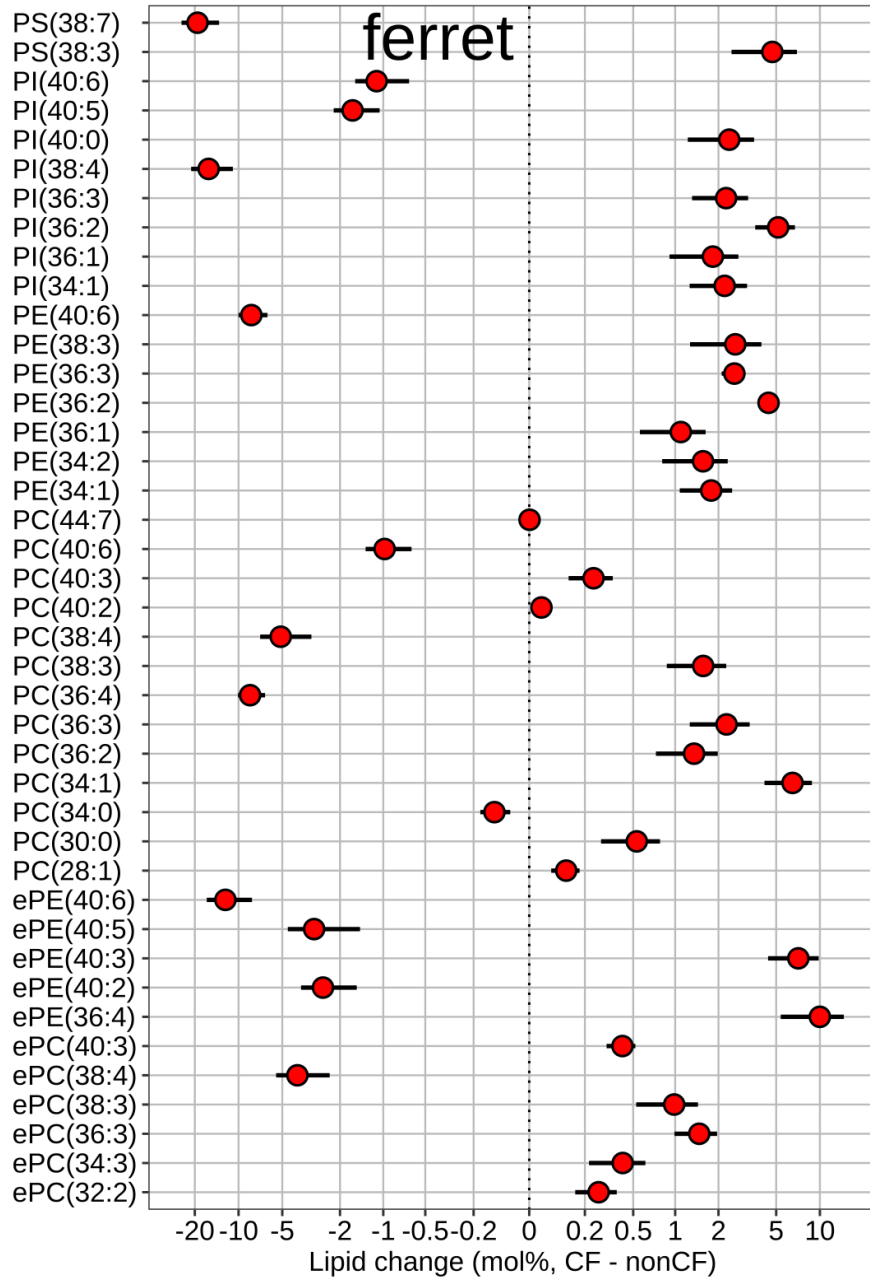

**Figure 7S: Ferret plasma phospholipid composition changes over the first 3 weeks of life.** N=11 ferrets per genotype, without repeated sampling, 1-4 samples per time point, 292 phospholipid species quantified. Principal component analysis, plotting the changes in fatty acid profile of CF (red) versus non-CF (blue) ferrets over time. The age in days for sample collection is indicated for each point on the graph.

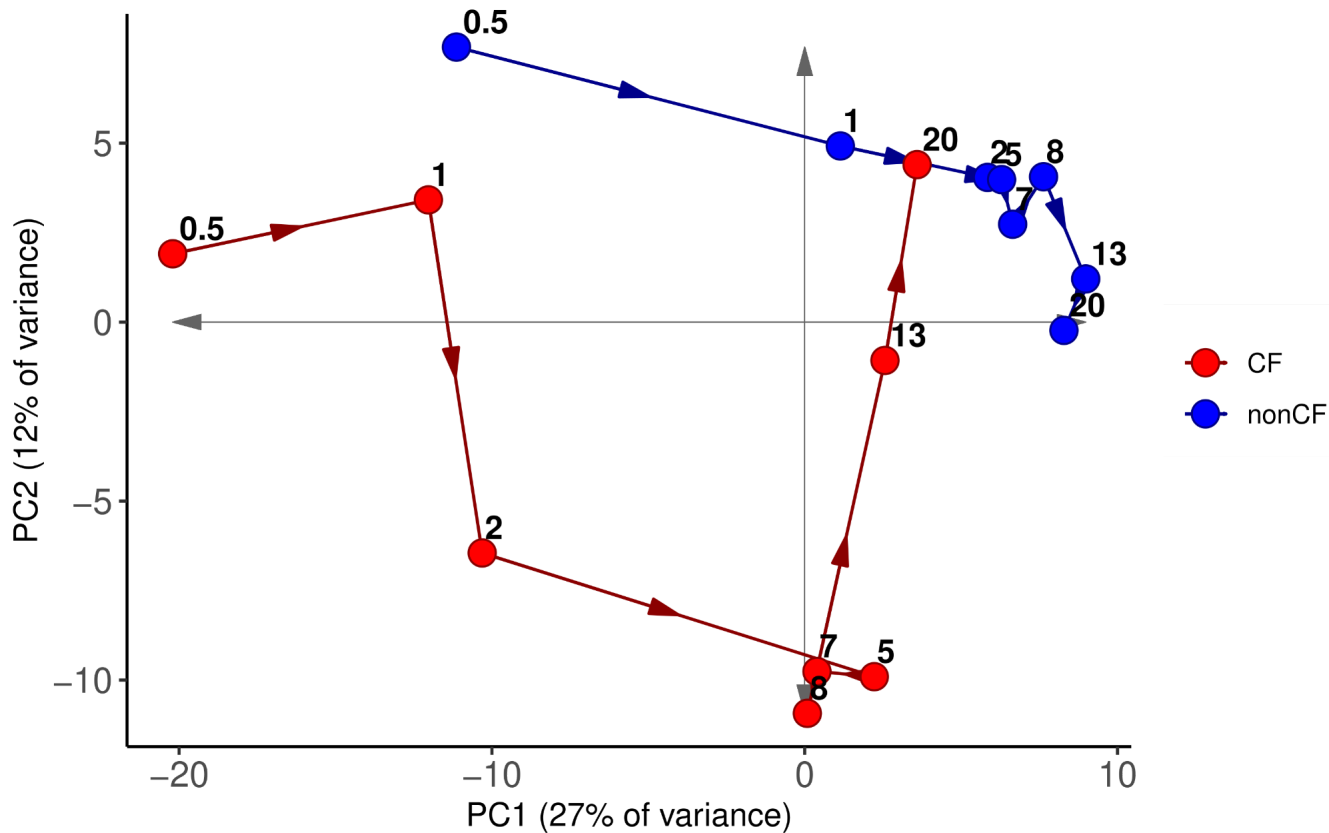

**Figure 8S: Relative influence of genotype (CF versus non-CF) and other factors on serum lipid concentrations measured by mass spectrometry.** The concentrations of 352-370 serum lipids were measured in serum from 22 ferrets (11 CF, 11 non-CF) and from 11 pigs (6 CF, 5 non-CF) and were subjected to Factor Analysis on Mixed Data. The resulting 2 principal dimensions in log10 space are shown, with the explained variance per axis noted in parentheses.

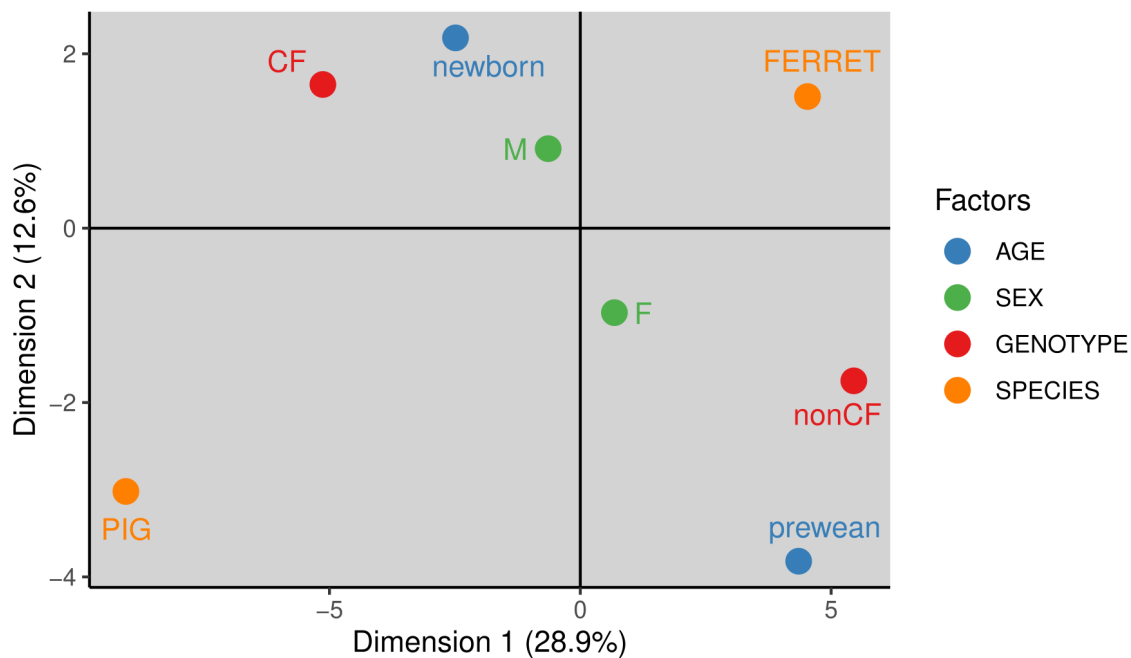



**Figure 9S: The impact of CF on concentrations of lipids in serum samples collected from pigs (A) or ferrets (B).** The volcano plots show changes in the concentration of individual serum lipid species between CF and non-CF samples, with significance determined by linear mixed effects modeling. The x-axis indicates the relative genotype effect difference in concentration (normalized by the mean concentration across the samples). Examination of 370 lipids with N= 5 versus 6 (A), and examination of 352 lipids with N= 11 versus 11 (B). Comparisons reaching only nominal significance with  $p < 0.05$  are orange; those also reaching a false discovery rate (FDR) of  $< 0.05$  are black; those also reaching Bonferroni adjusted significance of  $p < 0.05/370$  are red.

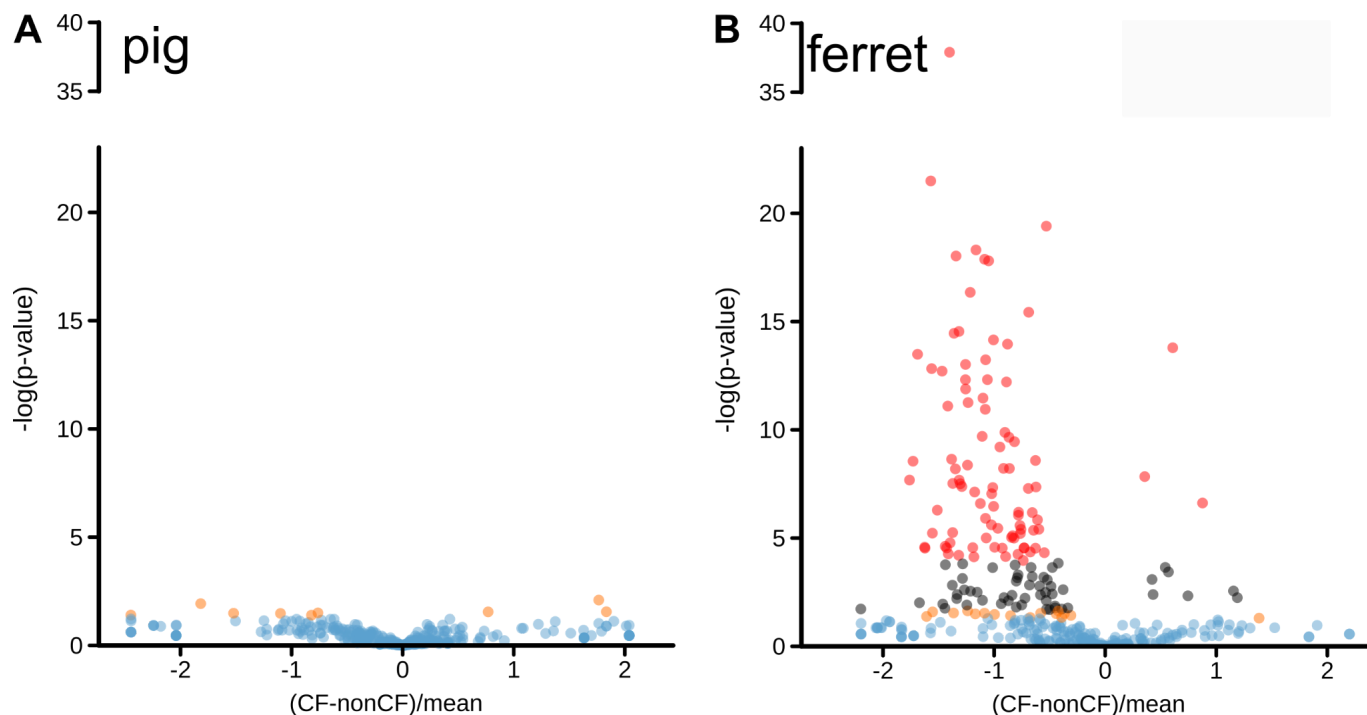

**Figure 10S: Changes in lipid species concentrations in ferret plasma over the first 3 weeks of life.** N=11 ferrets per genotype, without repeated sampling, 1-4 samples per time point, 370 lipid species quantified. Principal component analysis, plotting the changes in lipid concentration profile of CF (red) versus non-CF (blue) ferrets over time. The age in days for sample collection is indicated for each point on the graph.

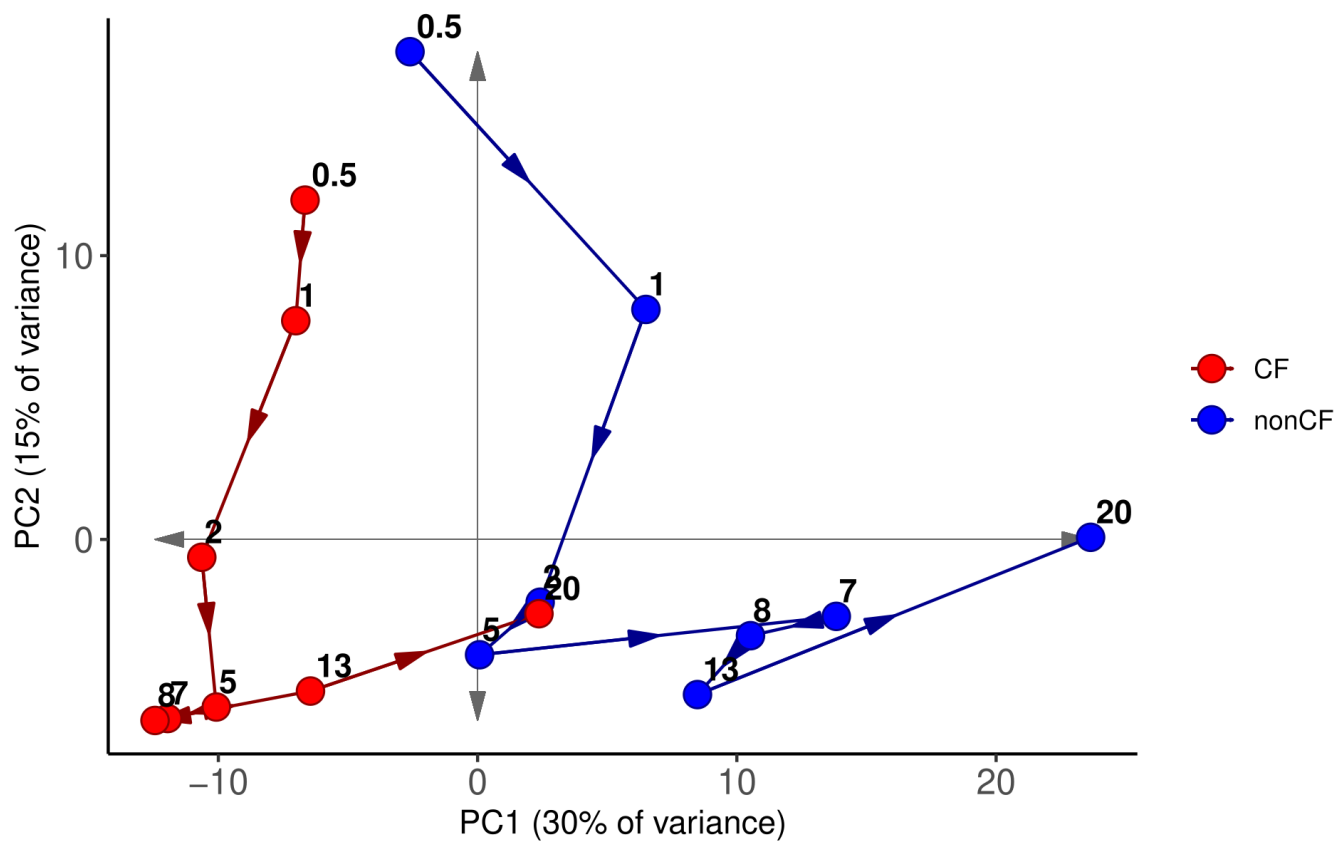

**Figure 11S: RNA expression of the indicated genes in newborn liver.** The species of measurement is indicated. Each dot represents measurement in an independent sample. \* FDR<0.05.

**ferret**

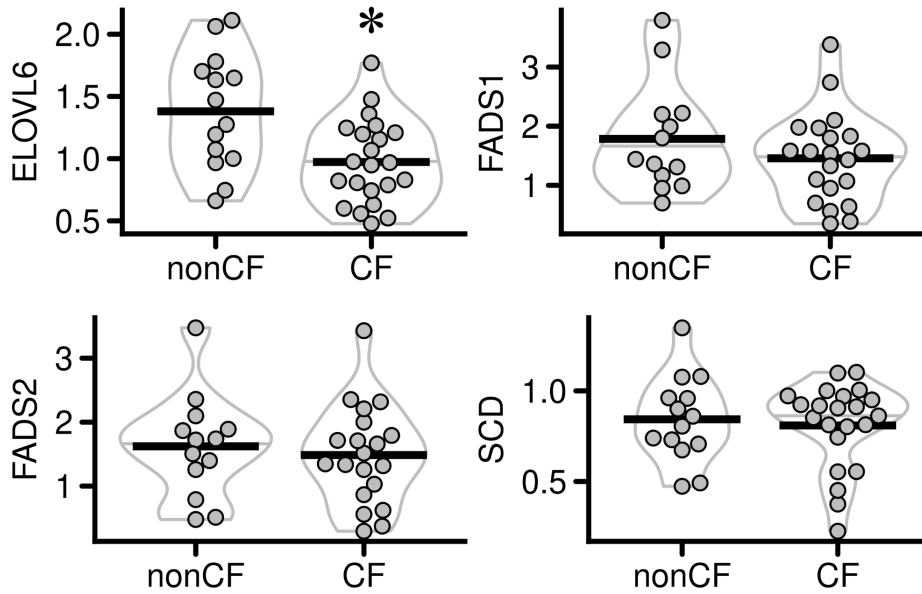

**pig**

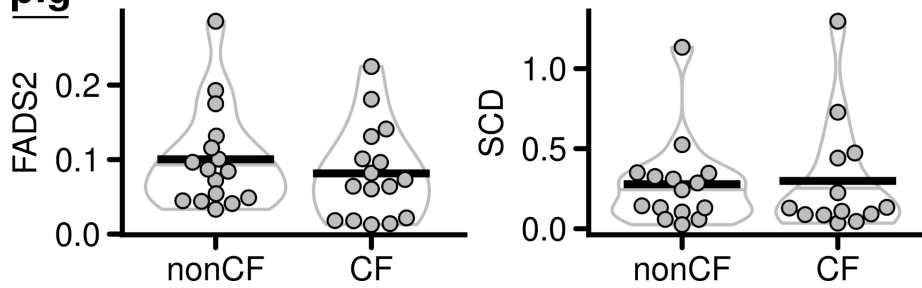

Supplement: CS-2022-0450_supp.pdf [file CS-2022-0450_supp.pdf]
